# Supplementary material for: Rapid and Low-Cost Quantification of Adulteration Content in Camellia Oil Utilizing UV-Vis-NIR Spectroscopy Combined with Feature Selection Methods
Source: MDPI journal article supplement (doi:10.3390/molecules28165943), 2023-08-08
Supplement: s1 [file s1]

# Rapid and Low-cost Quantification of Adulteration Content in *Camellia* Oil Utilizing UV-Vis-NIR Spectroscopy Combined with Feature Selection Methods

Qiang Liu, Zhongliang Gong, Dapeng Li \*, Tao Wen, Jinwei Guan and Wenfeng Zheng

School of Mechanical and Electrical Engineering, Central South University of Forestry and Technology,

Changsha, Hunan 410004, China

\*Correspondence: dapengli@csuft.edu.cn

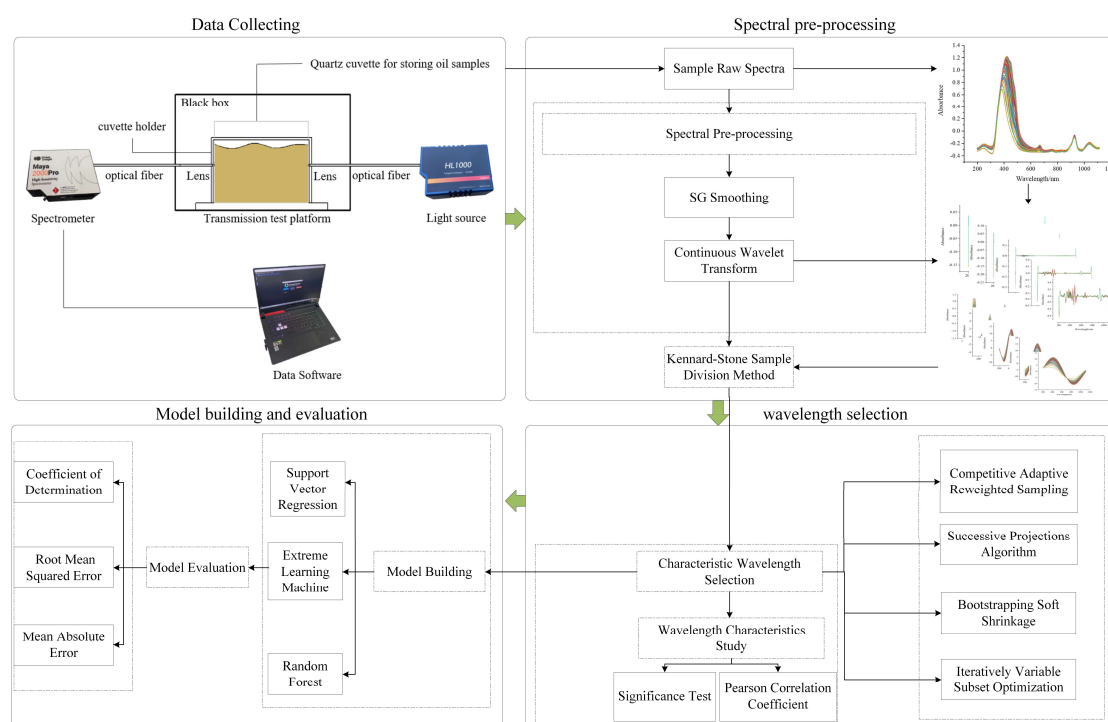

Figure S1. Research flowchart.
